# Supplementary material for: Dynamic Rheological Studies of Poly(p-phenyleneterephthalamide) and Carbon Nanotube Blends in Sulfuric Acid
Source: MDPI journal article supplement (doi:10.3390/ijms11041352), 2010-03-31
Supplement: s1 [file s1]

*Correction*

## **Dynamic Rheological Studies of Poly(*p*-phenyleneterephthalamide) and Carbon Nanotube Blends in Sulfuric Acid**

*Published: 15 October 2010*

---

A new version of the paper [1] was uploaded today. We found that the corresponding authors were not correctly marked. We would like to apologize for any inconvenience caused to our readers.

*Int. J. Mol. Sci.* Editorial Office

### **References**

1. Cao, Y.; Liu, Z.; Gao, X.; Yu, J.; Hu, Z.; Liang, Z. Dynamic Rheological Studies of Poly(*p*-phenyleneterephthalamide) and Carbon Nanotube Blends in Sulfuric Acid. *Int. J. Mol. Sci.* **2010**, *11*, 1352-1364.
